# Supplementary material for: Ce dopant effects on NaYF4 particle morphology and optical properties
Source: Royal Society of Chemistry journal article supplement (doi:10.1039/c5tc02147b), 2015-01-01
Supplement: c5tc02147b1.pdf [file c5tc02147b1.pdf]

## Supporting Information

### Ce Dopant Effects on NaYF<sub>4</sub> Particle Morphology and Optical Properties

Xinyu Zhao and Mei Chee Tan\*

Engineering Product Development, Singapore University of Technology and Design,  
Singapore, 8 Somapah Road, Singapore 487372

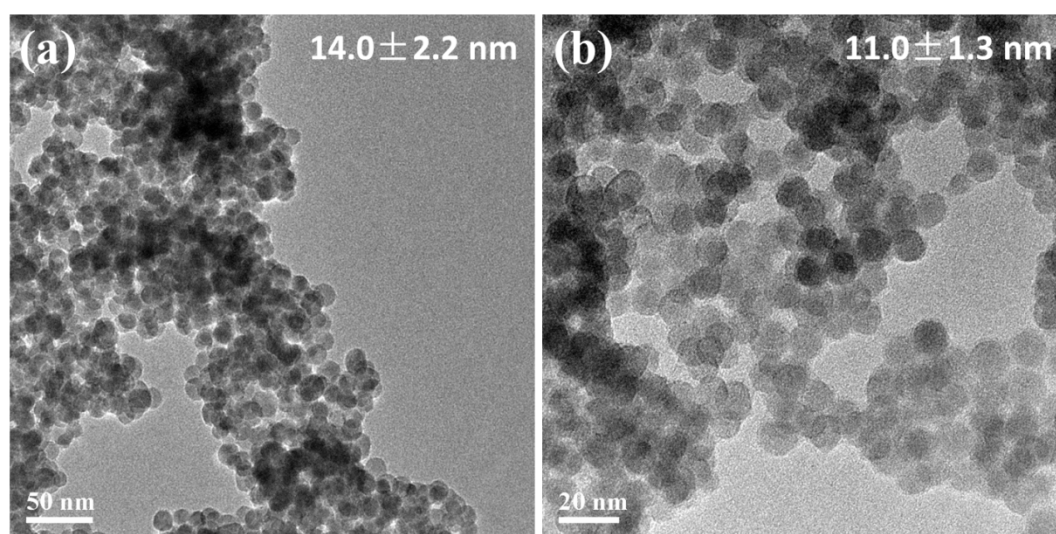

Figure S1. TEM images of N-NPs with Ce concentration of (a) 20 and (b) 50 mol%.  
The size distribution of particles is given in the images.

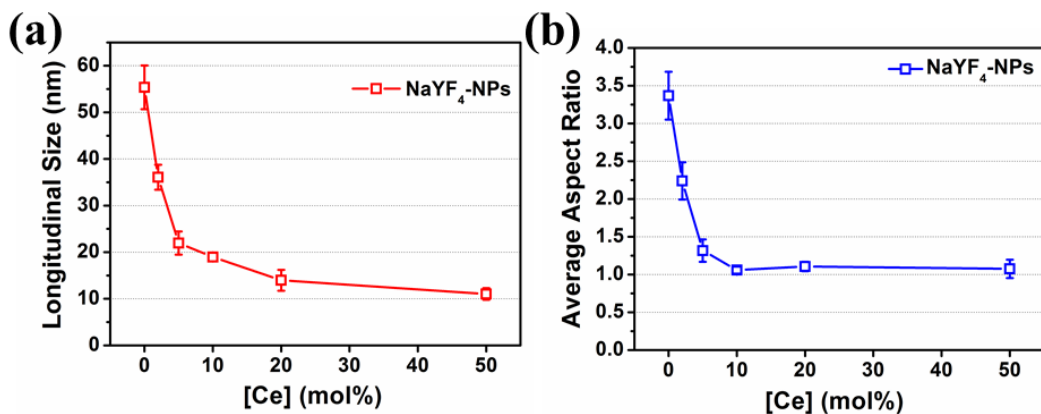

Figure S2. Average longitudinal dimension and aspect ratio of N-NPs with Ce concentrations from 0 to 50 mol%.

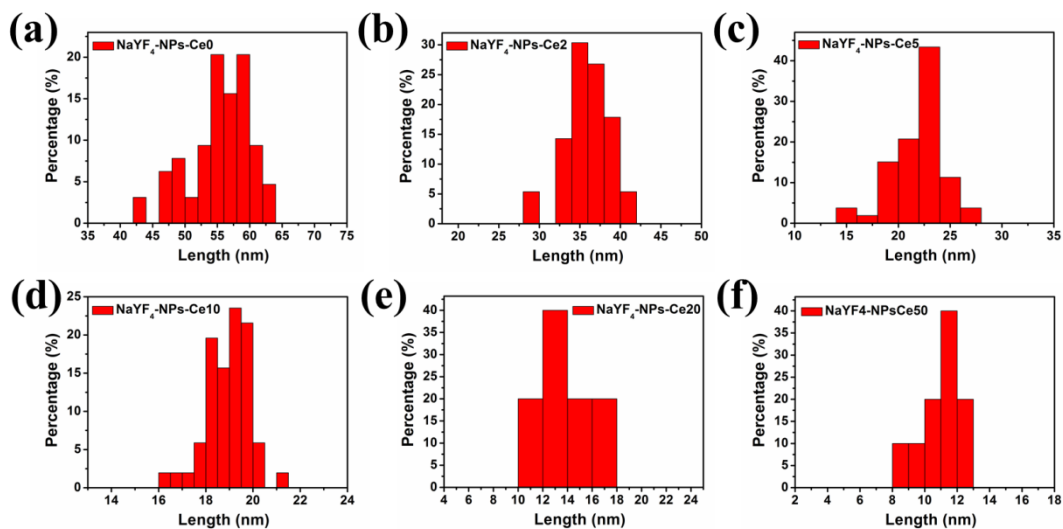

Figure S3. Size distributions of N-NPs with Ce concentration from 0 to 50 mol%.

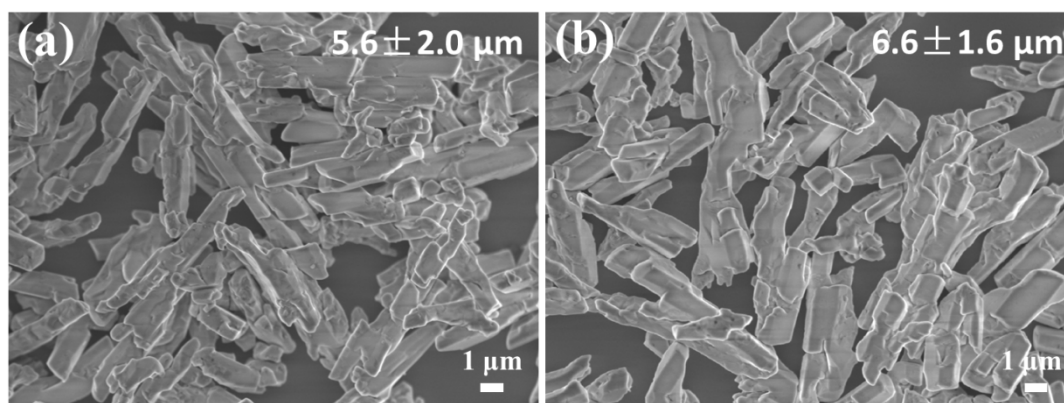

Figure S4. SEM images of N-NPs with Ce concentration of (a) 2 and (b) 5 mol%. The

distribution of the longitudinal dimension of particles is given in the images.

Table S1. EDX analysis results of N-MPs-Ce10, N-MPs-Ce20 and N-MPs-Ce50.

|                                    | Na<br>(at%) | Y<br>(at%) | F<br>(at%) | Ce<br>(at%) | Yb<br>(at%) | Er<br>(at%) |
|------------------------------------|-------------|------------|------------|-------------|-------------|-------------|
| <b>N-MPs-Ce10</b>                  | 11.5        | 13.4       | 66.1       | 2.9         | 5.5         | 0.5         |
| <b>N-MPs-Ce20-microparticle</b>    | 18.6        | 7.3        | 65.5       | 4.4         | 3.8         | 0.4         |
| <b>N-MPs-Ce20-submicroparticle</b> | 0.0         | 0.0        | 68.4       | 29.7        | 1.8         | 0.1         |
| <b>N-MPs-Ce50-microparticle</b>    | 7.6         | 5.5        | 67.5       | 14.3        | 4.7         | 0.5         |
| <b>N-MPs-Ce50-submicroparticle</b> | 0.0         | 0.0        | 69.1       | 28.9        | 1.5         | 0.4         |

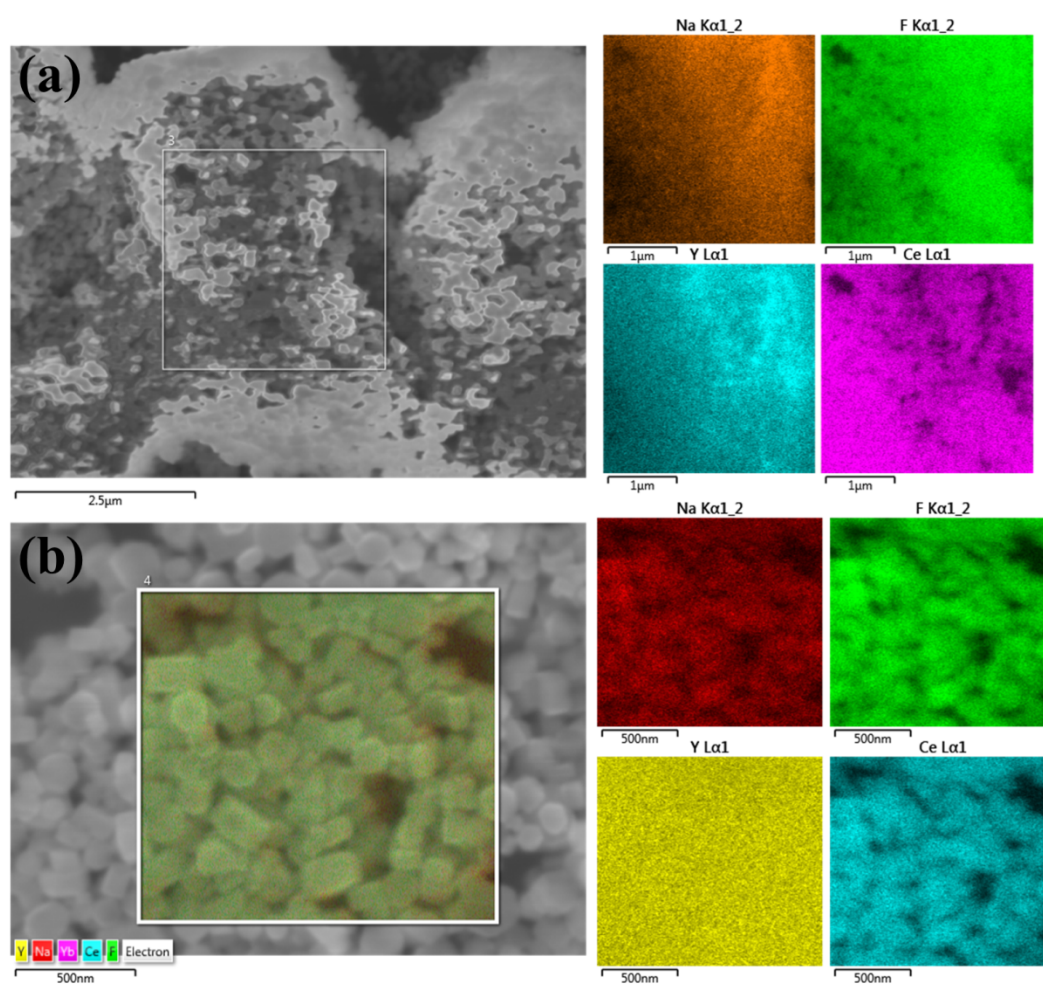

Figure S5. EDX image mapping of N-MPs-Ce50 at different regions: (a) region of microparticle; (b) region of submicroparticles.

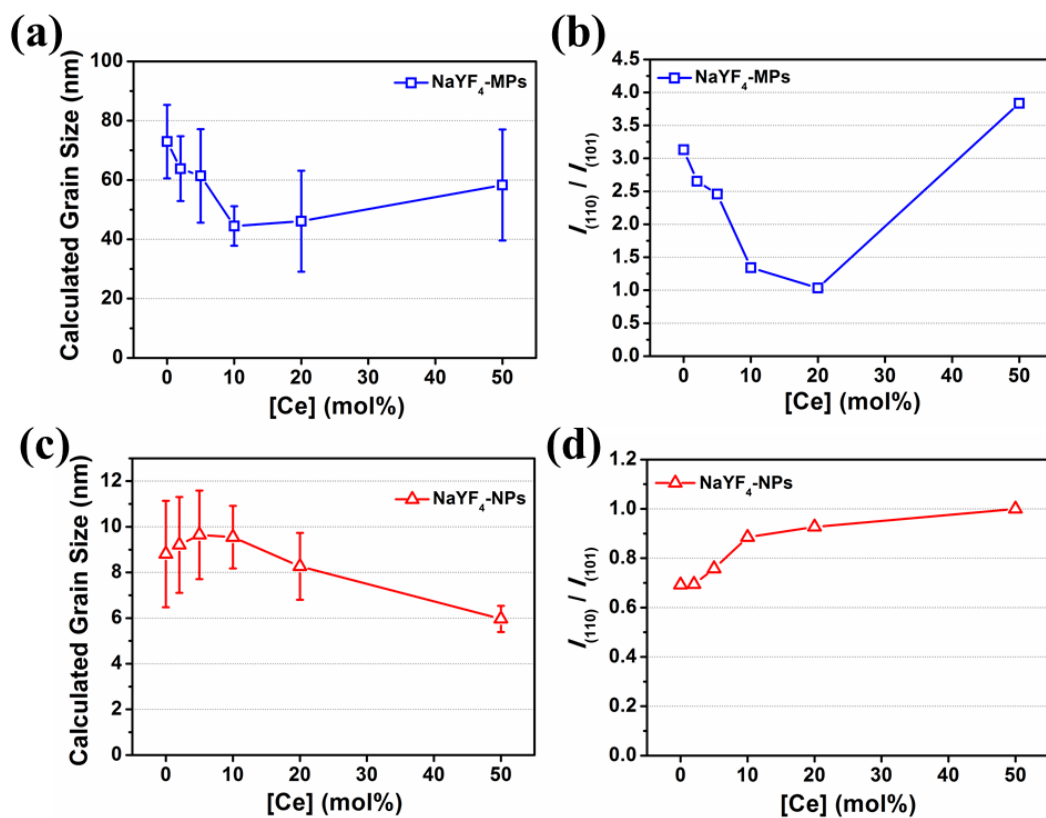

Figure S6. The calculated grain size (a, c) using the Scherrer equation and intensity ratio of (110) to (101) planes (b, d) from XRD patterns of N-MPs (a, b) and N-NPs (c, d) with Ce-doping concentration ranging from 0 to 50 mol%.

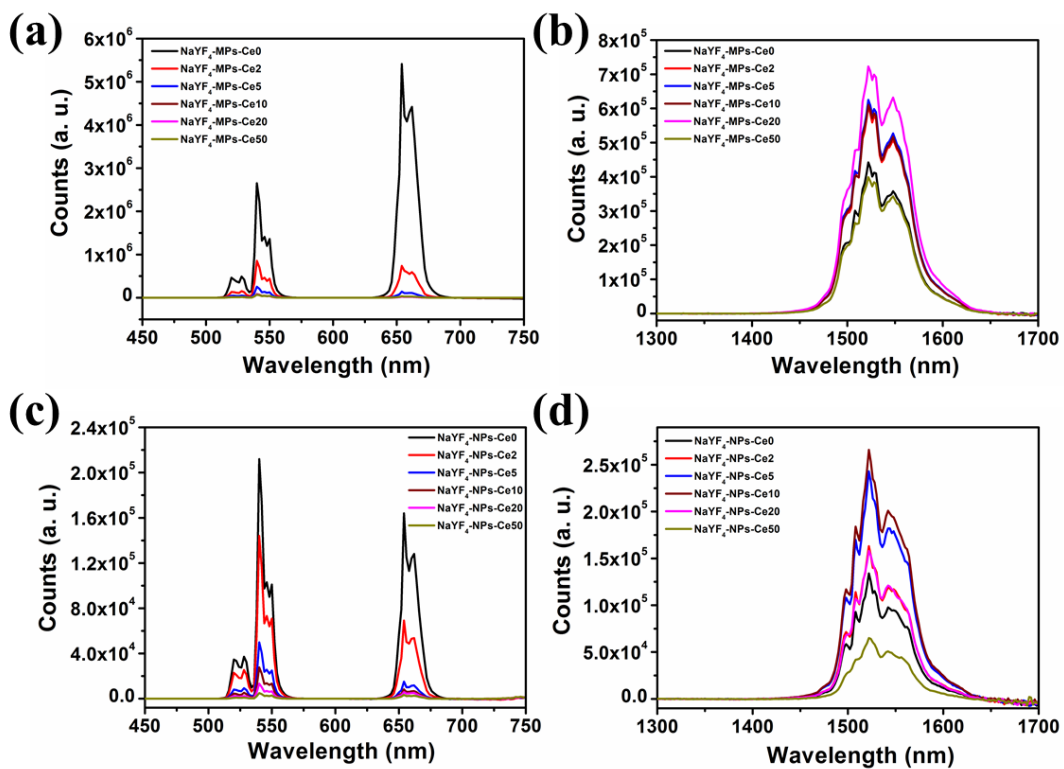

Figure S7. Up-conversion visible (a, c) and down-shifting infrared emissions (b, d) of N-MPs (a, b) and N-NPs (c, d).

Table S2. The fitted decay constants of time resolved emission spectra at 1530 nm for N-MPs and N-NPs using a double exponential equation.

| N-MPs | $\tau_1$ ( $\mu$ s) | Standard error | $\tau_2$ ( $\mu$ s) | Standard error | N-NPs | $\tau_1$ ( $\mu$ s) | Standard error | $\tau_2$ ( $\mu$ s) | Standard error |
|-------|---------------------|----------------|---------------------|----------------|-------|---------------------|----------------|---------------------|----------------|
| Ce0   | 3741.8              | 14.1           | 3741.8              | 14.1           | Ce0   | 342.8               | 4.4            | 2146.4              | 10.9           |
| Ce2   | 3901.9              | 13.3           | 3901.9              | 13.3           | Ce2   | 2213.9              | 10.7           | 353.7               | 5.6            |
| Ce5   | 3932.7              | 13.1           | 3932.7              | 13.1           | Ce5   | 433.4               | 12.0           | 2406.2              | 12.1           |
| Ce10  | 3457.4              | 9.3            | 3457.4              | 9.3            | Ce10  | 474.8               | 12.2           | 2480.4              | 13.8           |
| Ce20  | 3115.5              | 7.3            | 3115.5              | 7.3            | Ce20  | 1502.6              | 2.7E-6         | 1502.6              | 2.7E-6         |
| Ce50  | 1692.4              | 3.2            | 1692.4              | 3.2            | Ce50  | 939.5               | 6.0            | 213.3               | 2.8            |
